# Supplementary material for: Sero-epidemiological status and risk factors of toxoplasmosis in pregnant women in Northern Vietnam
Source: Springer Nature journal article supplement (doi:10.1186/s12879-019-3885-7), 2019-04-18
Supplement: MOESM2 [file 16665520]

## Additional file 2

### Tỷ lệ nhiễm huyết thanh và một số yếu tố liên quan đến nhiễm Toxoplasma ở phụ nữ có thai tại một số tỉnh miền Bắc, Việt Nam

---

#### CÂU HỎI PHÒNG VẤN

Mã bệnh nhân:

Người phỏng vấn: \_\_\_\_\_

Tên bệnh viện: \_\_\_\_\_

Ngày: \_\_\_\_ \ \_\_\_\_ \ 2016

#### Phần 1: Giới thiệu về nghiên cứu

Mục đích của đề tài này là nghiên cứu về ký sinh trùng *Toxoplasma gondii* ở phụ nữ mang thai. Nghiên cứu nhằm cung cấp các thông tin về tỷ lệ nhiễm, các yếu tố nguy cơ liên quan đến nhiễm bệnh, triệu chứng lâm sàng và cách phòng chống.

Nghiên cứu này đã được Bộ Y tế, Hội đồng Y đức của Viện Y học nhiệt đới Bỉ, Hội đồng y đức đại Học Antwerp Bỉ, Hội đồng Y đức Viện Sốt rét-KST-CT Trung ương phê duyệt.

#### Phần 2: Thông tin chung của người được phỏng vấn

1. Tuổi: \_\_\_\_\_

2. Địa chỉ/mã vùng:.....

3. Học vấn:

- Không đi học
- Tiểu học
- Trung học CS
- Trung học phổ thông
- Trung cấp, cao đẳng
- Đại học
- Sau đại học

4. Nghề nghiệp: (Có thể chọn nhiều câu trả lời)

- Nội trợ
- Nông dân
- Nghề nghiệp liên quan đến nông nghiệp
- Giúp việc gia đình

- Người giết mổ gia súc, gia cầm/hàng xẻ
- Nhân viên vệ sinh
- Thợ xây, thợ hồ
- Nhân viên văn phòng
- Kinh doanh

### Phần3: Bệnh sử

5. Tuổi thai (*Tính từ ngày đầu kỳ kinh cuối hoặc các biện pháp tính phù hợp*): \_\_\_\_\_ tuần
6. Số lần có thai trước đây: \_\_\_\_\_
7. Số lần bị thai lưu, chết chu sinh: \_\_\_\_\_ Vì sao \_\_\_\_\_
8. Chị có bị các dấu hiệu này trong trong thời gian mang thai không? (*Có thể chọn nhiều câu trả lời*)
- Triệu chứng của bệnh bạch cầu đơn nhân(*ví dụ: hạch cổ hoặc hạch nách cứng, đối xứng hai bên; triệu chứng giả cúm như sốt, khó chịu, đau cơ, viêm hầu họng, gan lách to*)
  - Viêm màng bồ đào (*ví dụ: đau, giảm thị lực, nhìn mờ, mù*)
  - Biểu hiện hệ thần kinh trung ương(*Ví dụ: đau đầu, thay đổi trạng thái tâm thần, động kinh, headache, altered mental status, seizures, hôn mê, sốt, mất hoặc giảm chú ý, liệt thần kinh trung ương, bất thường thị giác hoặc động kinh cục bộ*)
  - Triệu chứng khác (ghi rõ): \_\_\_\_\_
  - Không có triệu chứng nào như trên.

### Phần 4: Nhận thức

9. Chị đã từng nghe về bệnh Toxoplasma chưa? Có  Không
10. Anh chị biết thông tin về bệnh là nhờ đâu? (*Có thể chọn nhiều câu trả lời*)
- Bác sỹ
  - Internet
  - Bạn bè
  - Nguồn khác (ghi rõ): \_\_\_\_\_

### Phần 5: Thói quen ăn uống

11. Chị hay ăn loại thịt gì (mức độ thường xuyên)?  
(*Có thể chọn nhiều câu trả lời*)

- |                                       |                                        |                                  |                                       |
|---------------------------------------|----------------------------------------|----------------------------------|---------------------------------------|
| <input type="checkbox"/> Thịt lợn     | <input type="checkbox"/> Không bao giờ | <input type="checkbox"/> Đôi khi | <input type="checkbox"/> Thường xuyên |
| <input type="checkbox"/> Thịt bò      | <input type="checkbox"/> Không bao giờ | <input type="checkbox"/> Đôi khi | <input type="checkbox"/> Thường xuyên |
| <input type="checkbox"/> Thịt dê      | <input type="checkbox"/> Không bao giờ | <input type="checkbox"/> Đôi khi | <input type="checkbox"/> Thường xuyên |
| <input type="checkbox"/> Thịt gia cầm | <input type="checkbox"/> Không bao giờ | <input type="checkbox"/> Đôi khi | <input type="checkbox"/> Thường xuyên |
| <input type="checkbox"/> Cá           | <input type="checkbox"/> Không bao giờ | <input type="checkbox"/> Đôi khi | <input type="checkbox"/> Thường xuyên |
| <input type="checkbox"/> Chó          | <input type="checkbox"/> Không bao giờ | <input type="checkbox"/> Đôi khi | <input type="checkbox"/> Thường xuyên |
| <input type="checkbox"/> Mèo          | <input type="checkbox"/> Không bao giờ | <input type="checkbox"/> Đôi khi | <input type="checkbox"/> Thường xuyên |
- Loại khác, ghi rõ: .....  Không bao giờ       Đôi khi       Thường xuyên

### 12. Trung bình mỗi tuần chị ăn thịt mấy lần?

- 1 lần  2 lần  3 lần  4 lần  5 lần  6 lần  7 lần  Nhiều hơn (ghi rõ): \_\_\_\_\_

### 13. Chị chế biến thịt như thế nào?(Có thể chọn nhiều câu trả lời)

- |                                                       |                                        |                                  |                                       |
|-------------------------------------------------------|----------------------------------------|----------------------------------|---------------------------------------|
| <input type="checkbox"/> Tái                          | <input type="checkbox"/> Không bao giờ | <input type="checkbox"/> Đôi khi | <input type="checkbox"/> Thường xuyên |
| <input type="checkbox"/> Chín vừa                     | <input type="checkbox"/> Không bao giờ | <input type="checkbox"/> Đôi khi | <input type="checkbox"/> Thường xuyên |
| <input type="checkbox"/> Chín kỹ                      | <input type="checkbox"/> Không bao giờ | <input type="checkbox"/> Đôi khi | <input type="checkbox"/> Thường xuyên |
| <input type="checkbox"/> Xông khói, lên men, ướp muối | <input type="checkbox"/> Không bao giờ | <input type="checkbox"/> Đôi khi | <input type="checkbox"/> Thường xuyên |
| <input type="checkbox"/> Nướng                        | <input type="checkbox"/> Không bao giờ | <input type="checkbox"/> Đôi khi | <input type="checkbox"/> Thường xuyên |
| <input type="checkbox"/> Chiên                        | <input type="checkbox"/> Không bao giờ | <input type="checkbox"/> Đôi khi | <input type="checkbox"/> Thường xuyên |
- Cách chế biến khác, ghi rõ: \_\_\_\_\_

### 14. Anh chị có bảo quản lạnh thịt trước khi sử dụng không?

- Không bao giờ     Đôi khi     Thường xuyên     Luôn luôn

### 15. Chị có ăn rau sống hay sa lát bao giờ không?

- Không bao giờ     Đôi khi     Thường xuyên     Rất thường xuyên

### 16. Chị có rửa rau quả trước khi ăn sống không?

- Không bao giờ     Đôi khi     Thường xuyên     Luôn luôn

### 17. Chị thường rửa tay vào những thời điểm nào trong ngày?

(Có thể chọn nhiều câu trả lời)

- Trước khi ăn
- Sau khi nấu ăn
- Sau khi làm vườn
- Sau khi dọn nhà
- Sau khi dọn vệ sinh chỗ ở của mèo
- Sau khi làm việc gây bẩn tay
- Sau khi đi vệ sinh
- Không rửa
- Thời điểm khác, ghi rõ: \_\_\_\_\_

### 18. Chị dùng gì để rửa tay?

- Chỉ rửa với nước

- Nước và xà phòng

19. Chị rửa tay như thế nào?

- Rửa tay trong chậu nước và nhiều người trong gia đình sử dụng chung một chậu nước
- Rửa tay dưới vòi nước chảy (trực tiếp từ nước nhà máy)
- Rửa tay từ bồn chứa có vòi nước chảy
- Cách khác, ghi rõ: \_\_\_\_\_

20. Nguồn nước sử dụng trong sinh hoạt hàng ngày của gia đình chị?

(Có thể chọn nhiều câu trả lời)

- Sông
- Giếng không có nắp đậy
- Giếng có nắp đậy
- Nước mưa
- Nước vòi
- Nước đã được xử lý
- Nước đóng chai
- Nguồn khác, ghi rõ: \_\_\_\_\_

21. Chị có đun nước trước khi uống không?

- Không bao giờ    Đôi khi    Thường xuyên    Luôn luôn

## Phần 6: Các yếu tố sinh học

22. Chị có thường xuyên phải tiếp xúc với đất trong công việc hàng ngày không?

- Không bao giờ    Đôi khi    Thường xuyên    Luôn luôn

(Nếu chọn “Không bao giờ” thì chuyển câu 24)

23. Chị thường phải tiếp xúc với đất vào lúc nào?(có thể chọn nhiều câu trả lời)

- Khi làm việc (công việc thường xuyên, ví dụ nghề nông)
- Làm việc nhà
- Làm vườn
- Thời điểm khác, ghi rõ: \_\_\_\_\_

24. Chị có nuôi mèo không?

- Có
- Không   (Chuyển câu 37)

25. Chị nuôi mấy con mèo?

- 1    2    3    4    Khác: \_\_\_\_\_

26. Mèo nhà chị sống trong hay bên ngoài nhà?

- Trong nhà    Bên ngoài    Cả hai

27. Chị có dành chỗ đi vệ sinh riêng (hộp giấy, nhà...) cho mèo không?

Có       Không

28. Chị có hay vệ sinh hộp giấy, chỗ ở của mèo không?

Hàng ngày  Vài ngày một lần    Hàng tuần    Hiếm khi    Thỉnh thoảng

29. Thức ăn chị thường sử dụng cho mèo?( có thể chọn nhiều câu trả lời)

- Thức ăn khô (hộp thức ăn sẵn)
- Thức ăn ướt (hộp thức ăn sẵn)
- Thức ăn thừa của gia đình (có cả thịt)
- Nó tự kiếm ăn (bắt chuột...)
- Khác, ghi rõ: \_\_\_\_\_

30. Chị có cho mèo ăn không?

Không bao giờ    Đôi khi    Thường xuyên

31. Hàng xóm hoặc xung quanh nơi ở, nơi làm việc của chị có hộp hoặc khay vệ sinh của mèo không?

Không bao giờ    Đôi khi    Thường xuyên

### Phần 7: Kết thúc phỏng vấn

Đến đây, các nội dung phỏng vấn đã kết thúc. Xin cảm ơn chị đã nhiệt tình hợp tác.

Chị có ý kiến hay câu hỏi gì thêm không?

---

---

---

---
