# Supplementary material for: Sero-epidemiological status and risk factors of toxoplasmosis in pregnant women in Northern Vietnam
Source: Springer Nature journal article supplement (doi:10.1186/s12879-019-3885-7), 2019-04-18
Supplement: MOESM3 [file 16665520]

## Additional file 3

### Univariable analysis of risk factors of toxoplasmosis in pregnant women in Northern Vietnam

The questionnaire was analysed to detect socio-demographic and biologically plausible risk factors associated with toxoplasmosis, awareness, clinical history and presentation of signs and symptoms relating to toxoplasmosis. First the data were assessed for significance using univariable statistics (Additional file 3 Table 1 and 2). A generalized linear model with a binomial distribution and logit link function was applied. For categorical variables, the Pearson's chi-square test was used as a goodness of fit to proof that the observed data did not differ from the theoretical distribution. When any cell value had <5 observations and/or a separation problem occurred for a variable, a logistic regression model using Firth's bias reduction method and the Fisher's exact test was used. Thereafter, variables with a P value under the threshold  $P \leq 0.20$  were analysed in the multivariable model using a backward selection procedure. The variables that were significant in the univariable and multivariable analysis are summarized in Table 2 and 3 in the manuscript.

**Table 1. Univariable analysis of possible demographic and risk factors for toxoplasmosis in Hanoi.**

| Variable               | IgG seronegative<br>Nr (%) or<br>mean (sd) | IgG seropositive<br>Nr (%) or<br>mean (sd) | Odds Ratio<br>(95% CI) | P-value              |
|------------------------|--------------------------------------------|--------------------------------------------|------------------------|----------------------|
| <b>Demographics:</b>   |                                            |                                            |                        |                      |
| Age                    | 27 (5)                                     | 28 (5)                                     | 1.02 (0.927–1.13)      | 0.653                |
| Level of education:    |                                            |                                            |                        | 0.622 <sup>a,b</sup> |
| College                | 94 (94%)                                   | 6 (6%)                                     | —                      |                      |
| Primary school         | 1 (100%)                                   | 0 (0%)                                     | 4.85 (0.049–480)       |                      |
| Secondary school       | 59 (98%)                                   | 1 (2%)                                     | 0.367 (0.059–2.26)     |                      |
| High school            | 100 (96%)                                  | 4 (4%)                                     | 0.651 (0.188–2.25)     |                      |
| University degree      | 117 (95%)                                  | 6 (5%)                                     | 0.804 (0.261–2.48)     |                      |
| Post university degree | 12 (92%)                                   | 1 (8%)                                     | 1.74 (0.253–12.0)      |                      |
| <b>Profession:</b>     |                                            |                                            |                        |                      |
| Housewife              |                                            |                                            |                        | 0.710 <sup>a,b</sup> |
| No                     | 335 (95.2%)                                | 17 (4.8%)                                  | —                      |                      |
| Yes                    | 48 (98.0%)                                 | 1 (2.0%)                                   | 0.593 (0.107–3.28)     |                      |
| Farmer                 |                                            |                                            |                        | 0.386 <sup>a,b</sup> |
| No                     | 301 (95.0%)                                | 16 (5.0%)                                  | —                      |                      |
| Yes                    | 82 (97.6%)                                 | 2 (2.4%)                                   | 0.554 (0.142–2.16)     |                      |
| Agricultural sector    |                                            |                                            |                        | 1 <sup>a,b</sup>     |
| No                     | 369 (95%)                                  | 18 (5%)                                    | —                      |                      |
| Yes                    | 14 (100%)                                  | 0 (0%)                                     | 0.689 (0.036–13.2)     |                      |

|                                  |     |             |           |                    |                      |
|----------------------------------|-----|-------------|-----------|--------------------|----------------------|
| <b>Slaughter house worker</b>    |     |             |           |                    | 1 <sup>a,b</sup>     |
|                                  | No  | 381 (95%)   | 18 (5%)   | —                  |                      |
|                                  | Yes | 2 (100%)    | 0 (0%)    | 4.12 (0.097–175)   |                      |
| <b>Butcher</b>                   |     |             |           |                    | —                    |
|                                  | No  | 383 (95.5%) | 18 (4.5%) | —                  |                      |
| <b>Street cleaner</b>            |     |             |           |                    | 0.277 <sup>a,b</sup> |
|                                  | No  | 377 (95.7%) | 17 (4.3%) | —                  |                      |
|                                  | Yes | 6 (85.7%)   | 1 (14.3%) | 4.98 (0.703–35.3)  |                      |
| <b>Builder</b>                   |     |             |           |                    | 0.242 <sup>a,b</sup> |
|                                  | No  | 378 (95.7%) | 17 (4.3%) | —                  |                      |
|                                  | Yes | 5 (83.3%)   | 1 (16.7%) | 5.90 (0.792–43.9)  |                      |
| <b>Government employed</b>       |     |             |           |                    | 0.130 <sup>#</sup>   |
|                                  | No  | 229 (97.0%) | 7 (3.0%)  | —                  |                      |
|                                  | Yes | 154 (93.3%) | 11 (6.7%) | 2.34 (0.886–6.16)  |                      |
| <b>Business woman</b>            |     |             |           |                    | 1 <sup>a,b</sup>     |
|                                  | No  | 337 (95.5%) | 16 (4.5%) | —                  |                      |
|                                  | Yes | 46 (95.8%)  | 2 (4.2%)  | 1.10 (0.277–4.36)  |                      |
| <b>Other</b>                     |     |             |           |                    | 0.382 <sup>a,b</sup> |
|                                  | No  | 352 (95%)   | 18 (5%)   | —                  |                      |
|                                  | Yes | 31 (100%)   | 0 (0%)    | 0.302 (0.017–5.37) |                      |
| <b>Clinical history:</b>         |     |             |           |                    |                      |
| Gestational weeks                |     | 12 (1)      | 13 (1)    | 2.49 (1.20–5.18)   | 0.015* <sup>#</sup>  |
| Number of previous pregnancies   |     | 1.2 (1.1)   | 1.3 (1)   | 1.08 (0.711–1.65)  | 0.709                |
| Previous stillbirths             |     |             |           |                    | 0.201 <sup>a,b</sup> |
|                                  | No  | 259 (94.5%) | 15 (5.5%) | —                  |                      |
|                                  | Yes | 124 (97.6%) | 3 (2.4%)  | 0.471 (0.144–1.54) |                      |
| <b>Clinical symptoms</b>         |     |             |           |                    | 1 <sup>a,b</sup>     |
|                                  | No  | 358 (95.5%) | 17 (4.5%) | —                  |                      |
|                                  | Yes | 25 (96.2%)  | 1 (3.8%)  | 1.21 (0.210–6.90)  |                      |
| <b>Awareness:</b>                |     |             |           |                    |                      |
| <b>Heard about toxoplasmosis</b> |     |             |           |                    | 1 <sup>a,b</sup>     |
|                                  | No  | 375 (95%)   | 18 (5%)   | —                  |                      |
|                                  | Yes | 8 (100%)    | 0 (0%)    | 1.19 (0.056–25.5)  |                      |
| <b>Meat consumption:</b>         |     |             |           |                    |                      |
| <b>Pork</b>                      |     |             |           |                    | 1 <sup>a,b</sup>     |
|                                  | No  | 1 (100%)    | 0 (0%)    | —                  |                      |
|                                  | Yes | 382 (96%)   | 18 (4%)   | 0.145 (0.002–13.7) |                      |
| <b>Beef</b>                      |     |             |           |                    | 1 <sup>a,b</sup>     |
|                                  | No  | 20 (100%)   | 0 (0%)    | —                  |                      |

|                                     |     |             |           |                     |                        |
|-------------------------------------|-----|-------------|-----------|---------------------|------------------------|
|                                     | Yes | 363 (95%)   | 18 (5%)   | 2.09 (0.113–38.4)   |                        |
| Goat                                |     |             |           |                     | 0.602 <sup>a,b</sup>   |
|                                     | No  | 265 (95.0%) | 14 (5.0%) | —                   |                        |
|                                     | Yes | 118 (96.7%) | 4 (3.3%)  | 0.695 (0.235–2.05)  |                        |
| Chicken or duck                     |     |             |           |                     | 0.046 <sup>*#a,b</sup> |
|                                     | No  | 28 (87.5%)  | 4 (12.5%) | —                   |                        |
|                                     | Yes | 355 (96.2%) | 14 (3.8%) | 0.258 (0.083–0.806) |                        |
| Fish                                |     |             |           |                     | 0.206 <sup>a,b</sup>   |
|                                     | No  | 4 (80.0%)   | 1 (20.0%) | —                   |                        |
|                                     | Yes | 379 (95.7%) | 17 (4.3%) | 0.138 (0.017–1.11)  |                        |
| Dog                                 |     |             |           |                     | 0.852                  |
|                                     | No  | 193 (95.1%) | 10 (4.9%) | —                   |                        |
|                                     | Yes | 190 (96.0%) | 8 (4.0%)  | 0.813 (0.314–2.10)  |                        |
| Cat                                 |     |             |           |                     | 0.091 <sup>#</sup>     |
|                                     | No  | 324 (96.4%) | 12 (3.6%) | —                   |                        |
|                                     | Yes | 59 (90.8%)  | 6 (9.2%)  | 2.75 (0.992–7.60)   |                        |
| Frequency meat consumption per week |     | 8 (3)       | 8 (3)     | 1.06 (0.906–1.24)   | 0.471                  |
| How meat is consumed:               |     |             |           |                     |                        |
| Raw                                 |     |             |           |                     | 0.671 <sup>a,b</sup>   |
|                                     | No  | 349 (95.6%) | 16 (4.4%) | —                   |                        |
|                                     | Yes | 34 (94.4%)  | 2 (5.6%)  | 1.53 (0.381–6.18)   |                        |
| Medium rare                         |     |             |           |                     | 0.418                  |
|                                     | No  | 239 (96.4%) | 9 (3.6%)  | —                   |                        |
|                                     | Yes | 144 (94.1%) | 9 (5.9%)  | 1.66 (0.644–4.28)   |                        |
| Well done                           |     |             |           |                     | 1 <sup>a,b</sup>       |
|                                     | No  | 3 (100%)    | 0 (0%)    | —                   |                        |
|                                     | Yes | 380 (95%)   | 18 (5%)   | 0.340 (0.011–10.8)  |                        |
| Cured or smoked or fermented        |     |             |           |                     | 1 <sup>a,b</sup>       |
|                                     | No  | 334 (95.4%) | 16 (4.6%) | —                   |                        |
|                                     | Yes | 49 (96.1%)  | 2 (3.9%)  | 1.02 (0.259–4.05)   |                        |
| Bbq                                 |     |             |           |                     | 0.620                  |
|                                     | No  | 200 (94.8%) | 11 (5.2%) | —                   |                        |
|                                     | Yes | 183 (96.3%) | 7 (3.7%)  | 0.695 (0.264–1.83)  |                        |
| Microwave                           |     |             |           |                     | 0.751                  |
|                                     | No  | 187 (94.9%) | 10 (5.1%) | —                   |                        |
|                                     | Yes | 196 (96.1%) | 8 (3.9%)  | 0.763 (0.295–1.98)  |                        |
| Freezing of meat                    |     |             |           |                     | 0.583                  |
|                                     | No  | 75 (93.8%)  | 5 (6.2%)  | —                   |                        |
|                                     | Yes | 308 (96.0%) | 13 (4.0%) | 0.633 (0.219–1.83)  |                        |
| Fruit and vegetables:               |     |             |           |                     |                        |

|                                                     |       |             |           |                    |                      |
|-----------------------------------------------------|-------|-------------|-----------|--------------------|----------------------|
| Raw vegetable fruit or salads consumption           |       |             |           |                    | 0.652                |
|                                                     | No    | 139 (94.6%) | 8 (5.4%)  | —                  |                      |
|                                                     | Yes   | 244 (96.1%) | 10 (3.9%) | 0.712 (0.275–1.85) |                      |
| Washing vegetable fruit or salads before eating raw |       |             |           |                    | 1 <sup>a,b</sup>     |
|                                                     | No    | 20 (100%)   | 0 (0%)    | —                  |                      |
|                                                     | Yes   | 363 (95%)   | 18 (5%)   | 2.09 (0.113–38.4)  |                      |
| When hands are washed:                              |       |             |           |                    |                      |
| Before eating                                       |       |             |           |                    | 1 <sup>a,b</sup>     |
|                                                     | No    | 6 (100%)    | 0 (0%)    | —                  |                      |
|                                                     | Yes   | 377 (95%)   | 18 (5%)   | 0.637 (0.028–14.7) |                      |
| Before preparing food                               |       |             |           |                    | 0.613 <sup>a,b</sup> |
|                                                     | No    | 21 (100%)   | 0 (0%)    | —                  |                      |
|                                                     | Yes   | 362 (95%)   | 18 (5%)   | 2.19 (0.120–40.2)  |                      |
| After gardening                                     |       |             |           |                    | 0.914                |
|                                                     | No    | 112 (94.9%) | 6 (5.1%)  | —                  |                      |
|                                                     | Yes   | 271 (95.8%) | 12 (4.2%) | 0.827 (0.303–2.26) |                      |
| After cleaning the house or floor or pavement       |       |             |           |                    | 0.472 <sup>a,b</sup> |
|                                                     | No    | 46 (93.9%)  | 3 (6.1%)  | —                  |                      |
|                                                     | Yes   | 337 (95.7%) | 15 (4.3%) | 0.610 (0.182–2.05) |                      |
| After cleaning the cat litter box or cat faeces     |       |             |           |                    | 1                    |
|                                                     | No    | 275 (95.5%) | 13 (4.5%) | —                  |                      |
|                                                     | Yes   | 108 (95.6%) | 5 (4.4%)  | 0.979 (0.341–2.81) |                      |
| After handling something dirty                      |       |             |           |                    | 0.413 <sup>b</sup>   |
|                                                     | No    | 38 (92.7%)  | 3 (7.3%)  | —                  |                      |
|                                                     | Yes   | 345 (95.8%) | 15 (4.2%) | 0.493 (0.146–1.67) |                      |
| After using the toilet                              |       |             |           |                    | —                    |
|                                                     | Yes   | 383 (95.5%) | 18 (4.5%) | —                  |                      |
| How hands are washed:                               |       |             |           |                    |                      |
| Hand washing with water and/or soap                 |       |             |           |                    | 1 <sup>a,b</sup>     |
|                                                     | Soap  | 304 (95.3%) | 15 (4.7%) | —                  |                      |
|                                                     | Water | 79 (96.3%)  | 3 (3.7%)  | 0.865 (0.263–2.85) |                      |
| Where hands are washed:                             |       |             |           |                    |                      |
| Water in basin where hands are washed               |       |             |           |                    | 0.613 <sup>a,b</sup> |
|                                                     | No    | 360 (95%)   | 18 (5%)   | —                  |                      |
|                                                     | Yes   | 23 (100%)   | 0 (0%)    | 0.415 (0.023–7.53) |                      |
| Water from a tap for pouring on hands               |       |             |           |                    | 0.339                |
|                                                     | No    | 161 (97.0%) | 5 (3.0%)  | —                  |                      |

|                                                                  |     |             |           |                    |                     |   |
|------------------------------------------------------------------|-----|-------------|-----------|--------------------|---------------------|---|
|                                                                  | Yes | 222 (94.5%) | 13 (5.5%) | 1.89 (0.659–5.39)  |                     |   |
| Water from a container for pouring on hands                      |     |             |           |                    | 0.613               |   |
|                                                                  | No  | 243 (94.9%) | 13 (5.1%) | —                  |                     |   |
|                                                                  | Yes | 140 (96.6%) | 5 (3.4%)  | 0.668 (0.233–1.91) |                     |   |
| Usual source of water                                            |     |             |           |                    |                     |   |
| River                                                            |     |             |           |                    |                     | — |
|                                                                  | No  | 383 (95.5%) | 18 (4.5%) |                    |                     |   |
| Open source wells                                                |     |             |           |                    | 1 <sup>a,b</sup>    |   |
|                                                                  | No  | 376 (95%)   | 18 (5%)   | —                  |                     |   |
|                                                                  | Yes | 7 (100%)    | 0 (0%)    | 1.36 (0.061–30.0)  |                     |   |
| Bored wells                                                      |     |             |           |                    |                     | 1 |
|                                                                  | No  | 267 (95.4%) | 13 (4.6%) | —                  |                     |   |
|                                                                  | Yes | 116 (95.9%) | 5 (4.1%)  | 0.885 (0.309–2.54) |                     |   |
| Rain catchment                                                   |     |             |           |                    | 1 <sup>a,b</sup>    |   |
|                                                                  | No  | 368 (95%)   | 18 (5%)   | —                  |                     |   |
|                                                                  | Yes | 15 (100%)   | 0 (0%)    | 0.643 (0.034–12.2) |                     |   |
| Tap water                                                        |     |             |           |                    |                     | 1 |
|                                                                  | No  | 110 (95.7%) | 5 (4.3%)  | —                  |                     |   |
|                                                                  | Yes | 273 (95.5%) | 13 (4.5%) | 1.05 (0.365–3.01)  |                     |   |
| Treated water                                                    |     |             |           |                    |                     | — |
|                                                                  | No  | 383 (95.5%) | 18 (4.5%) | —                  |                     |   |
| Bottled water                                                    |     |             |           |                    | 1 <sup>a,b</sup>    |   |
|                                                                  | No  | 374 (95%)   | 18 (5%)   | —                  |                     |   |
|                                                                  | Yes | 9 (100%)    | 0 (0%)    | 1.07 (0.051–22.1)  |                     |   |
| Contact with soil/sand/floor/pavement/street in daily activities |     |             |           |                    | 0.462               |   |
|                                                                  | No  | 256 (96.2%) | 10 (3.8%) | —                  |                     |   |
|                                                                  | Yes | 127 (94.1%) | 8 (5.9%)  | 1.61 (0.621–4.19)  |                     |   |
| Context of contact with soil/sand/floor/pavement/street          |     |             |           |                    |                     |   |
| Work related                                                     |     |             |           |                    | 1 <sup>a,b</sup>    |   |
|                                                                  | No  | 364 (95%)   | 18 (5%)   | —                  |                     |   |
|                                                                  | Yes | 19 (100%)   | 0 (0%)    | 0.505 (0.027–9.35) |                     |   |
| Household tasks related                                          |     |             |           |                    | 0.0733 <sup>#</sup> |   |
|                                                                  | No  | 311 (96.6%) | 11 (3.4%) | —                  |                     |   |
|                                                                  | Yes | 72 (91.1%)  | 7 (8.9%)  | 2.75 (1.03–7.34)   |                     |   |
| Gardening                                                        |     |             |           |                    | 1 <sup>a,b</sup>    |   |
|                                                                  | No  | 323 (95.6%) | 15 (4.4%) | —                  |                     |   |
|                                                                  | Yes | 60 (95.2%)  | 3 (4.8%)  | 1.21 (0.364–4.01)  |                     |   |

| Cats                                                                   |                |             |                                                                                |                    |                       |
|------------------------------------------------------------------------|----------------|-------------|--------------------------------------------------------------------------------|--------------------|-----------------------|
| Cat at home                                                            |                |             |                                                                                |                    | 1                     |
|                                                                        | No             | 276 (95.5%) | 13 (4.5%)                                                                      | —                  |                       |
|                                                                        | Yes            | 107 (95.5%) | 5 (4.5%)                                                                       | 0.992 (0.345–2.85) |                       |
| Number of cats                                                         |                | 0.43 (0.92) | 0.67 (1.33)                                                                    | 1.22 (0.839–1.77)  | 0.301                 |
| Other (stray) cats on property/ in neighbourhood / in work environment |                |             |                                                                                |                    | 1                     |
|                                                                        | No             | 266 (95.3%) | 13 (4.7%)                                                                      | —                  |                       |
|                                                                        | Yes            | 117 (95.9%) | 5 (4.1%)                                                                       | 0.874 (0.305–2.51) |                       |
| Among cat owners:                                                      |                |             |                                                                                |                    |                       |
| Where the cat stays                                                    |                |             |                                                                                |                    | 0.833 <sup>a,b</sup>  |
| Both indoor and outdoor                                                |                | 14 (93.3%)  | 1 (6.7%)                                                                       | —                  |                       |
|                                                                        | Indoor         | 41 (95.3%)  | 2 (4.7%)                                                                       | 0.582 (0.067–5.07) |                       |
|                                                                        | Outdoor        | 52 (96.3%)  | 2 (3.7%)                                                                       | 0.460 (0.053–3.98) |                       |
| Cat litter box                                                         |                |             |                                                                                |                    | 0.676 <sup>a,b</sup>  |
|                                                                        | No             | 55 (96.5%)  | 2 (3.5%)                                                                       | —                  |                       |
|                                                                        | Yes            | 52 (94.5%)  | 3 (5.5%)                                                                       | 1.48 (0.276–7.95)  |                       |
| Contact with cat faeces / cleaning the cat litter box                  |                |             |                                                                                |                    | 0.605 <sup>a,b</sup>  |
|                                                                        | Every day      | 16 (94.1%)  | 1 (5.9%)                                                                       | —                  |                       |
|                                                                        | Every few days | 41 (97.6%)  | 1 (2.4%)                                                                       | 0.398 (0.037–4.31) |                       |
|                                                                        | Weekly         | 12 (92.3%)  | 1 (7.7%)                                                                       | 1.32 (0.113–15.4)  |                       |
|                                                                        | Rarely         | 38 (95.0%)  | 2 (5.0%)                                                                       | 0.714 (0.083–6.15) |                       |
|                                                                        | Never          |             | No cat owner never came in contact with cat faeces / cleans the cat litter box |                    |                       |
| Cat food                                                               |                |             |                                                                                |                    |                       |
| Commercial dry cat food                                                |                |             |                                                                                |                    | 0.544 <sup>a,b</sup>  |
|                                                                        | No             | 92 (95.8%)  | 4 (4.2%)                                                                       | —                  |                       |
|                                                                        | Yes            | 15 (93.8%)  | 1 (6.2%)                                                                       | 1.99 (0.277–14.3)  |                       |
| Commercial wet cat food                                                |                |             |                                                                                |                    | 0.129 <sup>#a,b</sup> |
|                                                                        | No             | 105 (96.3%) | 4 (3.7%)                                                                       | —                  |                       |
|                                                                        | Yes            | 2 (66.7%)   | 1 (33.3%)                                                                      | 14.1 (1.13–175)    |                       |
| Raw leftovers                                                          |                |             |                                                                                |                    | 1 <sup>a,b</sup>      |
|                                                                        | No             | 106 (95%)   | 5 (5%)                                                                         | —                  |                       |
|                                                                        | Yes            | 1 (100%)    | 0 (0%)                                                                         | 6.45 (0.064–647)   |                       |
| Well-cooked leftovers                                                  |                |             |                                                                                |                    | 1 <sup>a,b</sup>      |
|                                                                        | No             | 17 (94.4%)  | 1 (5.6%)                                                                       | —                  |                       |
|                                                                        | Yes            | 90 (95.7%)  | 4 (4.3%)                                                                       | 0.580 (0.082–4.12) |                       |
| Catches its own food                                                   |                |             |                                                                                |                    | 1 <sup>a,b</sup>      |
|                                                                        | No             | 104 (95%)   | 5 (5%)                                                                         | —                  |                       |

|                |     |            |          |                    |                      |
|----------------|-----|------------|----------|--------------------|----------------------|
|                | Yes | 3 (100%)   | 0 (0%)   | 2.71 (0.080–92.5)  |                      |
| Petting of cat |     |            |          |                    | 0.666 <sup>a,b</sup> |
|                | No  | 50 (94.3%) | 3 (5.7%) | —                  |                      |
|                | Yes | 57 (96.6%) | 2 (3.4%) | 0.627 (0.117–3.37) |                      |

\* Significant (P<0.05); # Under the threshold P≤0.20; <sup>a</sup> Obtained using Firth's bias reduction method; <sup>b</sup> Fisher's exact test

Abbreviations: CI, confidence interval; sd, standard deviation

**Table 2. Univariable analysis of possible demographic and risk factors for toxoplasmosis in Thai Binh.**

| Variable               | IgG Seronegative<br>Nr (%) or<br>mean (sd) | IgG Seropositive<br>Nr (%) or<br>mean (sd) | Odds Ratio<br>(95% CI) | P-value               |
|------------------------|--------------------------------------------|--------------------------------------------|------------------------|-----------------------|
| <b>Demographics:</b>   |                                            |                                            |                        |                       |
| Age                    | 28 (5)                                     | 28 (5)                                     | 0.977 (0.896–1.07)     | 0.597                 |
| Level of education:    |                                            |                                            |                        | 0.157 <sup>#a,b</sup> |
| College                | 92 (93%)                                   | 7 (7%)                                     | —                      |                       |
| Preschool              | 1 (100%)                                   | 0 (0%)                                     | 4.11 (0.042–404)       |                       |
| Primary school         | 9 (75%)                                    | 3 (25%)                                    | 4.54 (1.04–19.9)       |                       |
| Secondary school       | 94 (97%)                                   | 3 (3%)                                     | 0.457 (0.124–1.69)     |                       |
| High school            | 85 (93%)                                   | 6 (7%)                                     | 0.938 (0.313–2.81)     |                       |
| University degree      | 87 (96%)                                   | 4 (4%)                                     | 0.634 (0.189–2.13)     |                       |
| Post university degree | 3 (100%)                                   | 0 (0%)                                     | 1.76 (0.053–58.5)      |                       |
| <b>Profession:</b>     |                                            |                                            |                        |                       |
| Housewife              |                                            |                                            |                        | 1 <sup>a,b</sup>      |
|                        | No                                         | 297 (94.0%)                                | 19 (6.0%)              | —                     |
|                        | Yes                                        | 74 (94.9%)                                 | 4 (5.1%)               | 0.922 (0.319–2.66)    |
| Farmer                 |                                            |                                            |                        | 0.545 <sup>a,b</sup>  |
|                        | No                                         | 320 (94.4%)                                | 19 (5.6%)              | —                     |
|                        | Yes                                        | 51 (92.7%)                                 | 4 (7.3%)               | 1.44 (0.490–4.21)     |
| Agricultural sector    |                                            |                                            |                        | 1 <sup>a,b</sup>      |
|                        | No                                         | 363 (94%)                                  | 23 (6%)                | —                     |
|                        | Yes                                        | 8 (100%)                                   | 0 (0%)                 | 0.910 (0.043–19.3)    |
| Slaughter house worker |                                            |                                            |                        | 1 <sup>a,b</sup>      |
|                        | No                                         | 368 (94%)                                  | 23 (6%)                | —                     |
|                        | Yes                                        | 3 (100%)                                   | 0 (0%)                 | 2.24 (0.071–70.4)     |
| Butcher                |                                            |                                            |                        | 1 <sup>a,b</sup>      |
|                        | No                                         | 370 (94%)                                  | 23 (6%)                | —                     |
|                        | Yes                                        | 1 (100%)                                   | 0 (0%)                 | 5.26 (0.056–495)      |
| Street cleaner         |                                            |                                            |                        | 0.114 <sup>#a,b</sup> |
|                        | No                                         | 370 (94.4%)                                | 22 (5.6%)              | —                     |
|                        | Yes                                        | 1 (50.0%)                                  | 1 (50.0%)              | 16.5 (0.997–272)      |

|                                  |     |             |           |                     |                         |
|----------------------------------|-----|-------------|-----------|---------------------|-------------------------|
| <b>Builder</b>                   |     |             |           |                     | —                       |
|                                  | No  | 371 (94.2%) | 23 (5.8%) | —                   |                         |
| <b>Government employed</b>       |     |             |           |                     | 0.751                   |
|                                  | No  | 221 (93.6%) | 15 (6.4%) | —                   |                         |
|                                  | Yes | 150 (94.9%) | 8 (5.1%)  | 0.786 (0.325–1.90)  |                         |
| <b>Business woman</b>            |     |             |           |                     | 0.373 <sup>a,b</sup>    |
|                                  | No  | 351 (94.4%) | 21 (5.6%) | —                   |                         |
|                                  | Yes | 20 (90.9%)  | 2 (9.1%)  | 1.99 (0.486–8.18)   |                         |
| <b>Other</b>                     |     |             |           |                     | 1 <sup>a,b</sup>        |
|                                  | No  | 306 (94.2%) | 19 (5.8%) | —                   |                         |
|                                  | Yes | 65 (94.2%)  | 4 (5.8%)  | 1.08 (0.372–3.13)   |                         |
| <b>Clinical history:</b>         |     |             |           |                     |                         |
| Gestational weeks                |     | 10 (3)      | 10 (2)    | 0.965 (0.815–1.14)  | 0.674                   |
| Number of previous pregnancies   |     | 1.2 (1.1)   | 1.4 (1.1) | 1.11 (0.782–1.58)   | 0.558                   |
| Previous stillbirths             |     |             |           |                     | 0.309                   |
|                                  | No  | 241 (95.3%) | 12 (4.7%) | —                   |                         |
|                                  | Yes | 130 (92.2%) | 11 (7.8%) | 1.70 (0.730–3.96)   |                         |
| <b>Clinical symptoms</b>         |     |             |           |                     | 1 <sup>a,b</sup>        |
|                                  | No  | 350 (94.1%) | 22 (5.9%) | —                   |                         |
|                                  | Yes | 21 (95.5%)  | 1 (4.5%)  | 1.09 (0.190–6.23)   |                         |
| <b>Awareness:</b>                |     |             |           |                     |                         |
| <b>Heard about toxoplasmosis</b> |     |             |           |                     | 1 <sup>a,b</sup>        |
|                                  | No  | 358 (94%)   | 23 (6%)   | —                   |                         |
|                                  | Yes | 13 (100%)   | 0 (0%)    | 0.565 (0.029–10.9)  |                         |
| <b>Meat consumption:</b>         |     |             |           |                     |                         |
| <b>Pork</b>                      |     |             |           |                     | 0.0095* <sup>#a,b</sup> |
|                                  | No  | 1 (33.3%)   | 2 (66.7%) | —                   |                         |
|                                  | Yes | 370 (94.6%) | 21 (5.4%) | 0.035 (0.003–0.375) |                         |
| <b>Beef</b>                      |     |             |           |                     | 0.274 <sup>a,b</sup>    |
|                                  | No  | 36 (90.0%)  | 4 (10.0%) | —                   |                         |
|                                  | Yes | 335 (94.6%) | 19 (5.4%) | 0.471 (0.158–1.40)  |                         |
| <b>Goat</b>                      |     |             |           |                     | 0.824                   |
|                                  | No  | 274 (93.8%) | 18 (6.2%) | —                   |                         |
|                                  | Yes | 97 (95.1%)  | 5 (4.9%)  | 0.785 (0.284–2.17)  |                         |
| <b>Chicken or Duck</b>           |     |             |           |                     | 0.114 <sup>#a,b</sup>   |
|                                  | No  | 1 (50.0%)   | 1 (50.0%) | —                   |                         |
|                                  | Yes | 370 (94.4%) | 22 (5.6%) | 0.061 (0.004–1.00)  |                         |
| <b>Fish</b>                      |     |             |           |                     | 0.261 <sup>a,b</sup>    |
|                                  | No  | 4 (80.0%)   | 1 (20.0%) | —                   |                         |

|                                                            |     |             |           |                    |                      |
|------------------------------------------------------------|-----|-------------|-----------|--------------------|----------------------|
|                                                            | Yes | 367 (94.3%) | 22 (5.7%) | 0.184 (0.023–1.45) |                      |
| <b>Dog</b>                                                 |     |             |           |                    | 0.802                |
|                                                            | No  | 143 (93.5%) | 10 (6.5%) | —                  |                      |
|                                                            | Yes | 228 (94.6%) | 13 (5.4%) | 0.815 (0.348–1.91) |                      |
| <b>Cat</b>                                                 |     |             |           |                    | 0.957                |
|                                                            | No  | 199 (93.9%) | 13 (6.1%) | —                  |                      |
|                                                            | Yes | 172 (94.5%) | 10 (5.5%) | 0.890 (0.381–2.08) |                      |
| Frequency meat consumption per week                        |     | 10 (3)      | 9 (4)     | 0.906 (0.803–1.02) | 0.108 <sup>#</sup>   |
| <b>How meat is consumed:</b>                               |     |             |           |                    |                      |
| <b>Raw</b>                                                 |     |             |           |                    | 0.779 <sup>a,b</sup> |
|                                                            | No  | 308 (93.9%) | 20 (6.1%) | —                  |                      |
|                                                            | Yes | 63 (95.5%)  | 3 (4.5%)  | 0.829 (0.257–2.68) |                      |
| <b>Medium rare</b>                                         |     |             |           |                    | 0.319                |
|                                                            | No  | 101 (91.8%) | 9 (8.2%)  | —                  |                      |
|                                                            | Yes | 270 (95.1%) | 14 (4.9%) | 0.582 (0.244–1.39) |                      |
| <b>Well done</b>                                           |     |             |           |                    | 0.261 <sup>a,b</sup> |
|                                                            | No  | 4 (80.0%)   | 1 (20.0%) | —                  |                      |
|                                                            | Yes | 367 (94.3%) | 22 (5.7%) | 0.184 (0.023–1.45) |                      |
| <b>Cured or smoked or fermented</b>                        |     |             |           |                    | 1 <sup>a,b</sup>     |
|                                                            | No  | 305 (94.1%) | 19 (5.9%) | —                  |                      |
|                                                            | Yes | 66 (94.3%)  | 4 (5.7%)  | 1.06 (0.365–3.08)  |                      |
| <b>Bbq</b>                                                 |     |             |           |                    | 1                    |
|                                                            | No  | 169 (94.4%) | 10 (5.6%) | —                  |                      |
|                                                            | Yes | 202 (94.0%) | 13 (6.0%) | 1.09 (0.465–2.54)  |                      |
| <b>Microwave</b>                                           |     |             |           |                    | 0.585                |
|                                                            | No  | 101 (92.7%) | 8 (7.3%)  | —                  |                      |
|                                                            | Yes | 270 (94.7%) | 15 (5.3%) | 0.701 (0.289–1.70) |                      |
| <b>Freezing of meat</b>                                    |     |             |           |                    | 0.455 <sup>a,b</sup> |
|                                                            | No  | 33 (91.7%)  | 3 (8.3%)  | —                  |                      |
|                                                            | Yes | 338 (94.4%) | 20 (5.6%) | 0.580 (0.174–1.93) |                      |
| <b>Fruit and vegetables:</b>                               |     |             |           |                    |                      |
| <b>Raw vegetable fruit or salads consumption</b>           |     |             |           |                    | 1 <sup>a,b</sup>     |
|                                                            | No  | 74 (94.9%)  | 4 (5.1%)  | —                  |                      |
|                                                            | Yes | 297 (94.0%) | 19 (6.0%) | 1.09 (0.375–3.14)  |                      |
| <b>Washing vegetable fruit or salads before eating raw</b> |     |             |           |                    | 1 <sup>a,b</sup>     |
|                                                            | No  | 8 (100%)    | 0 (0%)    | —                  |                      |
|                                                            | Yes | 363 (94%)   | 23 (6%)   | 1.10 (0.052–23.3)  |                      |
| <b>When hands are washed:</b>                              |     |             |           |                    |                      |

|                                                 |       |             |           |                    |                       |
|-------------------------------------------------|-------|-------------|-----------|--------------------|-----------------------|
| Before eating                                   |       |             |           |                    | 1 <sup>a,b</sup>      |
|                                                 | No    | 5 (100%)    | 0 (0%)    | —                  |                       |
|                                                 | Yes   | 366 (94%)   | 23 (6%)   | 0.705 (0.029–17.3) |                       |
| Before preparing food                           |       |             |           |                    | 0.404 <sup>a,b</sup>  |
|                                                 | No    | 27 (90.0%)  | 3 (10.0%) | —                  |                       |
|                                                 | Yes   | 344 (94.5%) | 20 (5.5%) | 0.468 (0.139–1.58) |                       |
| After gardening                                 |       |             |           |                    | 0.274 <sup>a,b</sup>  |
|                                                 | No    | 36 (90.0%)  | 4 (10.0%) | —                  |                       |
|                                                 | Yes   | 335 (94.6%) | 19 (5.4%) | 0.471 (0.158–1.40) |                       |
| After cleaning the house or floor or pavement   |       |             |           |                    | 0.328 <sup>a,b</sup>  |
|                                                 | No    | 18 (90.0%)  | 2 (10.0%) | —                  |                       |
|                                                 | Yes   | 353 (94.4%) | 21 (5.6%) | 0.450 (0.109–1.87) |                       |
| After cleaning the cat litter box or cat faeces |       |             |           |                    | 1                     |
|                                                 | No    | 223 (94.1%) | 14 (5.9%) | —                  |                       |
|                                                 | Yes   | 148 (94.3%) | 9 (5.7%)  | 0.969 (0.409–2.30) |                       |
| After handling something dirty                  |       |             |           |                    | 1 <sup>a,b</sup>      |
|                                                 | No    | 1 (100%)    | 0 (0%)    | —                  |                       |
|                                                 | Yes   | 370 (94%)   | 23 (6%)   | 0.190 (0.002–17.9) |                       |
| After using the toilet                          |       |             |           |                    | —                     |
|                                                 | Yes   | 371 (94.2%) | 23 (5.8%) | —                  |                       |
| How hands are washed:                           |       |             |           |                    |                       |
| Hand washing with water and/or soap             |       |             |           |                    | 1                     |
|                                                 | Soap  | 289 (94.1%) | 18 (5.9%) | —                  |                       |
|                                                 | Water | 82 (94.3%)  | 5 (5.7%)  | 0.979 (0.353–2.72) |                       |
| Where hands are washed:                         |       |             |           |                    |                       |
| Water in basin where hands are washed           |       |             |           |                    | 1 <sup>a,b</sup>      |
|                                                 | No    | 366 (94%)   | 23 (6%)   | —                  |                       |
|                                                 | Yes   | 5 (100%)    | 0 (0%)    | 1.42 (0.058–34.7)  |                       |
| Water from a tap for pouring on hands           |       |             |           |                    | 0.802                 |
|                                                 | No    | 196 (94.7%) | 11 (5.3%) | —                  |                       |
|                                                 | Yes   | 175 (93.6%) | 12 (6.4%) | 1.22 (0.526–2.84)  |                       |
| Water from a container for pouring on hands     |       |             |           |                    | 0.92                  |
|                                                 | No    | 181 (93.8%) | 12 (6.2%) | —                  |                       |
|                                                 | Yes   | 190 (94.5%) | 11 (5.5%) | 0.873 (0.376–2.03) |                       |
| Usual source of water                           |       |             |           |                    |                       |
| River                                           |       |             |           |                    | 0.058 <sup>#a,b</sup> |
|                                                 | No    | 371 (94%)   | 22 (6%)   | —                  |                       |
|                                                 | Yes   | 0 (0%)      | 1 (100%)  | 49.5 (0.525–4 670) |                       |

|                                                                        |     |             |             |                    |                      |
|------------------------------------------------------------------------|-----|-------------|-------------|--------------------|----------------------|
| Open source wells                                                      |     |             |             |                    | 0.385 <sup>a,b</sup> |
|                                                                        | No  | 364 (94.3%) | 22 (5.7%)   | —                  |                      |
|                                                                        | Yes | 7 (87.5%)   | 1 (12.5%)   | 3.24 (0.481–21.8)  |                      |
| Bored wells                                                            |     |             |             |                    | 0.843                |
|                                                                        | No  | 305 (94.4%) | 18 (5.6%)   | —                  |                      |
|                                                                        | Yes | 66 (93.0%)  | 5 (7.0%)    | 1.28 (0.460–3.58)  |                      |
| Rain catchment                                                         |     |             |             |                    | 0.492 <sup>a,b</sup> |
|                                                                        | No  | 330 (93.8%) | 22 (6.2%)   | —                  |                      |
|                                                                        | Yes | 41 (97.6%)  | 1 (2.4%)    | 0.531 (0.97–2.91)  |                      |
| Tap water                                                              |     |             |             |                    | 0.803                |
|                                                                        | No  | 80 (93.0%)  | 6 (7.0%)    | —                  |                      |
|                                                                        | Yes | 291 (94.5%) | 17 (5.5%)   | 0.779 (0.297–2.04) |                      |
| Treated water                                                          |     |             |             |                    | —                    |
|                                                                        | No  | 371 (94.2%) | 23 (5.8%)   | —                  |                      |
| Bottled water                                                          |     |             |             |                    | 1 <sup>a,b</sup>     |
|                                                                        | No  | 368 (94%)   | 23 (6%)     | —                  |                      |
|                                                                        | Yes | 3 (100%)    | 0 (0%)      | 2.24 (0.071–70.4)  |                      |
| Contact with soil/sand/floor/pavement/street in daily activities       |     |             |             |                    | 0.462                |
|                                                                        | No  | 80 (92.0%)  | 7 (8.0%)    | —                  |                      |
|                                                                        | Yes | 291 (94.8%) | 16 (5.2%)   | 0.628 (0.250–1.58) |                      |
| Context of contact with soil/sand/floor/pavement/street                |     |             |             |                    |                      |
| Work related                                                           |     |             |             |                    | 0.753 <sup>a,b</sup> |
|                                                                        | No  | 324 (93.9%) | 21 (6.1%)   | —                  |                      |
|                                                                        | Yes | 47 (95.9%)  | 2 (4.1%)    | 0.794 (0.204–3.09) |                      |
| Household tasks related                                                |     |             |             |                    | 0.762                |
|                                                                        | No  | 141 (93.4%) | 10 (6.6%)   | —                  |                      |
|                                                                        | Yes | 230 (94.7%) | 13 (5.3%)   | 0.797 (0.340–1.87) |                      |
| Gardening                                                              |     |             |             |                    | 0.591 <sup>a,b</sup> |
|                                                                        | No  | 300 (93.8%) | 20 (6.2%)   | —                  |                      |
|                                                                        | Yes | 71 (95.9%)  | 3 (4.1%)    | 0.718 (0.223–2.31) |                      |
| Cats                                                                   |     |             |             |                    |                      |
| Cat at home                                                            |     |             |             |                    | 1                    |
|                                                                        | No  | 228 (94.2%) | 14 (5.8%)   | —                  |                      |
|                                                                        | Yes | 143 (94.1%) | 9 (5.9%)    | 1.02 (0.432–2.43)  |                      |
| Number of cats                                                         |     |             |             |                    | 0.600                |
|                                                                        |     | 0.58 (0.89) | 0.48 (0.67) | 0.867 (0.508–1.48) |                      |
| Other (stray) cats on property/ in neighbourhood / in work environment |     |             |             |                    | 0.246                |

|                                                       |                         |             |           |                    |                       |
|-------------------------------------------------------|-------------------------|-------------|-----------|--------------------|-----------------------|
|                                                       | No                      | 237 (92.9%) | 18 (7.1%) | —                  |                       |
|                                                       | Yes                     | 133 (96.4%) | 5 (3.6%)  | 0.495 (0.180–1.36) |                       |
| <b>Among cat owners:</b>                              |                         |             |           |                    |                       |
| Where the cat stays                                   |                         |             |           |                    | 0.427 <sup>a,b</sup>  |
|                                                       | Both indoor and outdoor | 66 (92%)    | 6 (8%)    | —                  |                       |
|                                                       | Indoor                  | 26 (100%)   | 0 (0%)    | 0.193 (0.010–3.74) |                       |
|                                                       | Outdoor                 | 53 (95%)    | 3 (5%)    | 0.669 (0.172–2.61) |                       |
| Cat litter box                                        |                         |             |           |                    | 0.292 <sup>a,b</sup>  |
|                                                       | No                      | 93 (95.9%)  | 4 (4.1%)  | —                  |                       |
|                                                       | Yes                     | 52 (91.2%)  | 5 (8.8%)  | 2.18 (0.593–7.98)  |                       |
| Contact with cat faeces / cleaning the cat litter box |                         |             |           |                    | 0.506 <sup>a,b</sup>  |
|                                                       | Every day               | 20 (91%)    | 2 (9%)    | —                  |                       |
|                                                       | Every few days          | 46 (98%)    | 1 (2%)    | 0.265 (0.032–2.21) |                       |
|                                                       | Weekly                  | 21 (91%)    | 2 (9%)    | 0.953 (0.143–6.35) |                       |
|                                                       | Rarely                  | 56 (93%)    | 4 (7%)    | 0.653 (0.125–3.42) |                       |
|                                                       | Never                   | 2 (100%)    | 0 (0%)    | 1.64 (0.031–85.5)  |                       |
| <b>Cat food</b>                                       |                         |             |           |                    |                       |
| Commercial dry cat food                               |                         |             |           |                    | 0.107 <sup>#a,b</sup> |
|                                                       | No                      | 137 (95.1%) | 7 (4.9%)  | —                  |                       |
|                                                       | Yes                     | 8 (80.0%)   | 2 (20.0%) | 5.39 (1.03–28.2)   |                       |
| Commercial wet cat food                               |                         |             |           |                    | 0.169 <sup>#a,b</sup> |
|                                                       | No                      | 134 (95.0%) | 7 (5.0%)  | —                  |                       |
|                                                       | Yes                     | 11 (84.6%)  | 2 (15.4%) | 3.90 (0.787–19.3)  |                       |
| Raw leftovers                                         |                         |             |           |                    | 1 <sup>a,b</sup>      |
|                                                       | No                      | 140 (94%)   | 9 (6%)    | —                  |                       |
|                                                       | Yes                     | 5 (100%)    | 0 (0%)    | 1.34 (0.053–34.3)  |                       |
| Well-cooked leftovers                                 |                         |             |           |                    | 0.107 <sup>#a,b</sup> |
|                                                       | No                      | 18 (85.7%)  | 3 (14.3%) | —                  |                       |
|                                                       | Yes                     | 127 (95.5%) | 6 (4.5%)  | 0.269 (0.066–1.11) |                       |
| Catches its own food                                  |                         |             |           |                    | 0.719 <sup>a,b</sup>  |
|                                                       | No                      | 96 (93.2%)  | 7 (6.8%)  | —                  |                       |
|                                                       | Yes                     | 49 (96.1%)  | 2 (3.9%)  | 0.650 (0.147–2.87) |                       |
| Petting of cat                                        |                         |             |           |                    | 0.467 <sup>a,b</sup>  |
|                                                       | No                      | 45 (91.8%)  | 4 (8.2%)  | —                  |                       |
|                                                       | Yes                     | 100 (95.2%) | 5 (4.8%)  | 0.553 (0.150–2.04) |                       |

\* Significant ( $P < 0.05$ ); # Under the threshold  $P \leq 0.20$ ; <sup>a</sup> Obtained using Firth's bias reduction method; <sup>b</sup> Fisher's exact test

Abbreviations: CI, confidence interval; sd, standard deviation
